# Supplementary material for: A novel n-type organic semiconductor comprising a 1,5-naphthyridine-2,6-dione unit
Source: Royal Society of Chemistry journal article supplement (doi:10.1039/d2tc03882j), 2022-01-01
Supplement: d2tc03882j1.pdf [file d2tc03882j1.pdf]

Supporting Information for

**Novel n-Type Organic Semiconductor  
Comprising 1,5-naphthyridine-2,6-dione Unit †**

Su-Yeon Kim,<sup>a</sup> Jin Hong Kim,<sup>a</sup> Min-Woo Choi,<sup>a</sup> and Soo Young Park<sup>\*a</sup>

<sup>a</sup>Center for Supra molecular Optoelectronic Materials, Department of Materials Science and Engineering, Seoul National University, 1 Gwanak-ro, Gwanak-gu, Seoul 08826, Korea

† Electronic Supplementary Information (ESI) available: *Supporting data (Fig. S1-S11 and Tables S1-S3) and NMR Spectra.*

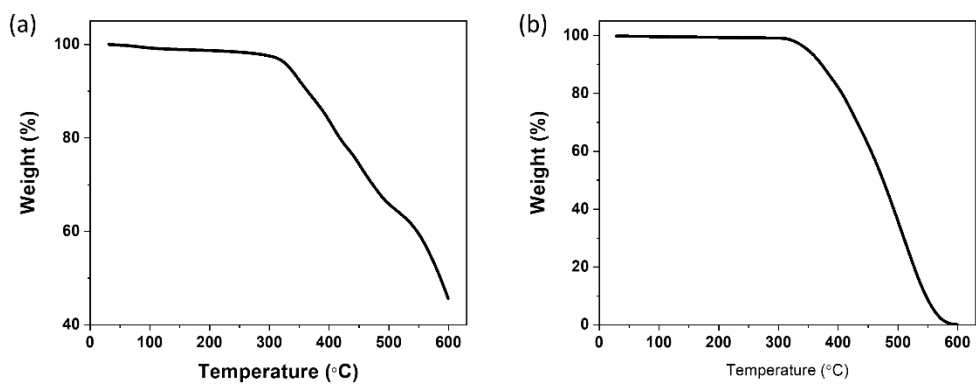

Figure S1. TGA curves for (a) NTD-DCV and (b) NTDP-DCV.

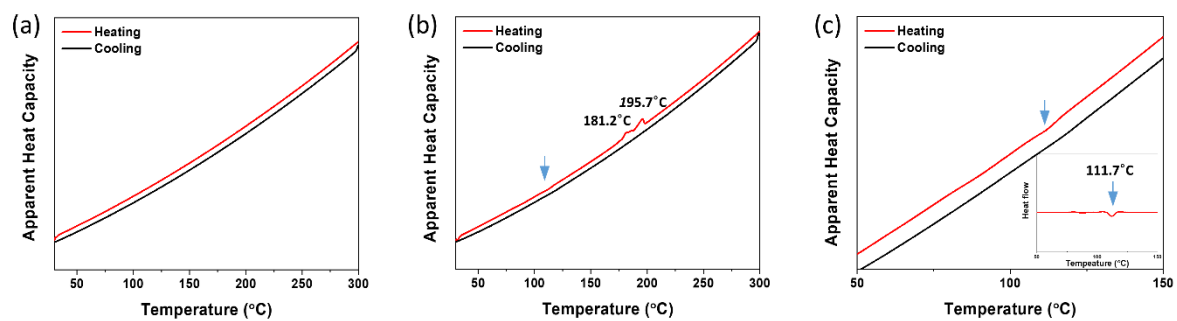

Figure S2. Second cycle DSC curves for (a) **NTDI-DCV** and (b) **NTDP-DCV**. (c) The DSC curves range from 50 to 150°C and baseline corrected curve (bottom right) of **NTDP-DCV** (blue arrow indicated the cold crystallization).

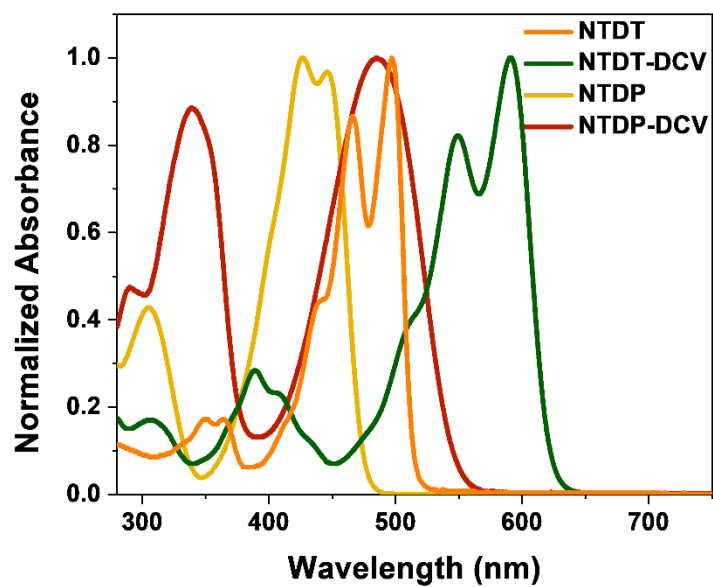

Figure S3. Normalized UV-vis absorption spectra of NTD-DCV derivatives in the in the  $1.0 \times 10^{-5} \text{ M L}^{-1} \text{ CHCl}_3$  solutions.

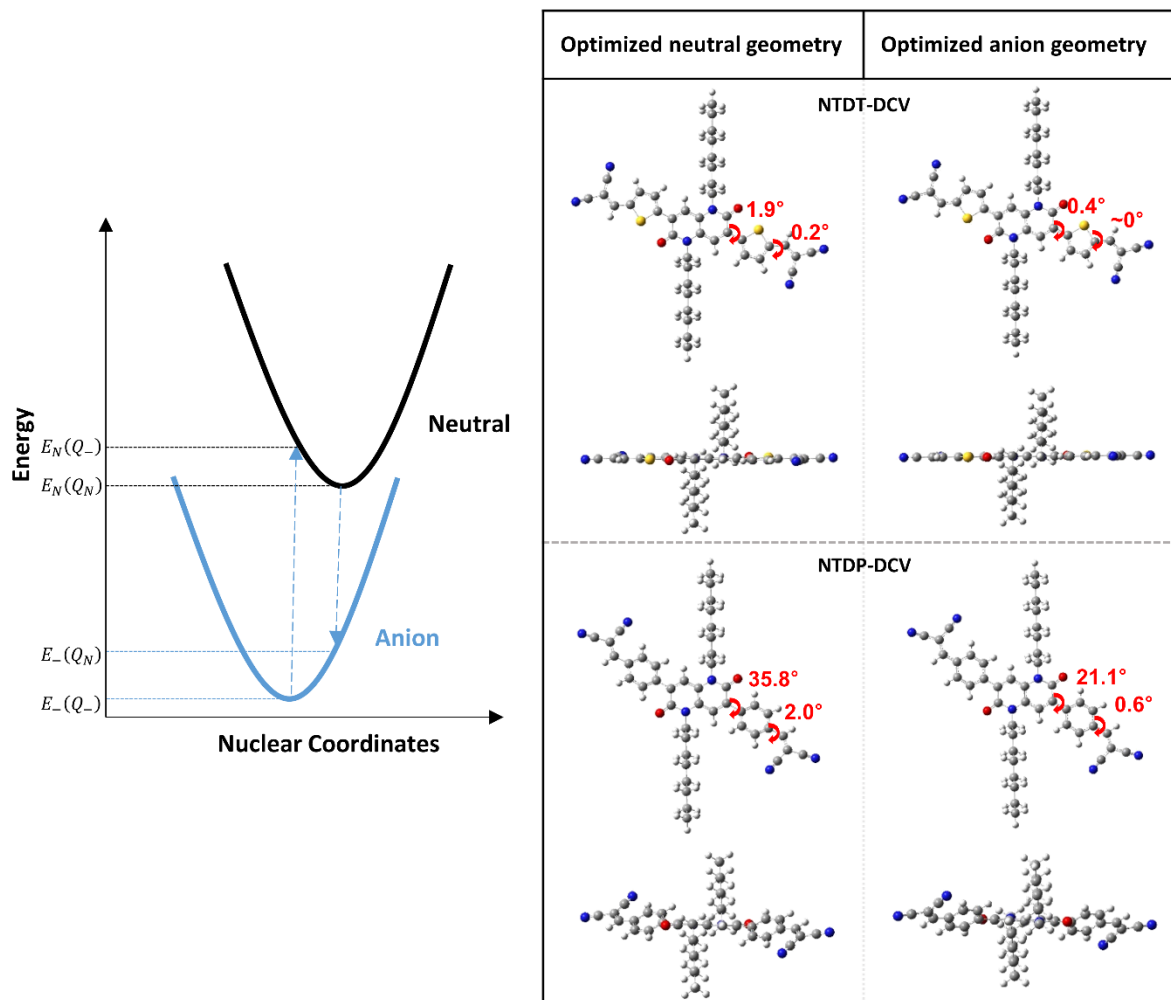

Figure S4. Schematic description of the electron reorganization energy diagram and the optimized neutral and anion geometries of **NTDT-DCV** and **NTDP-DCV**.

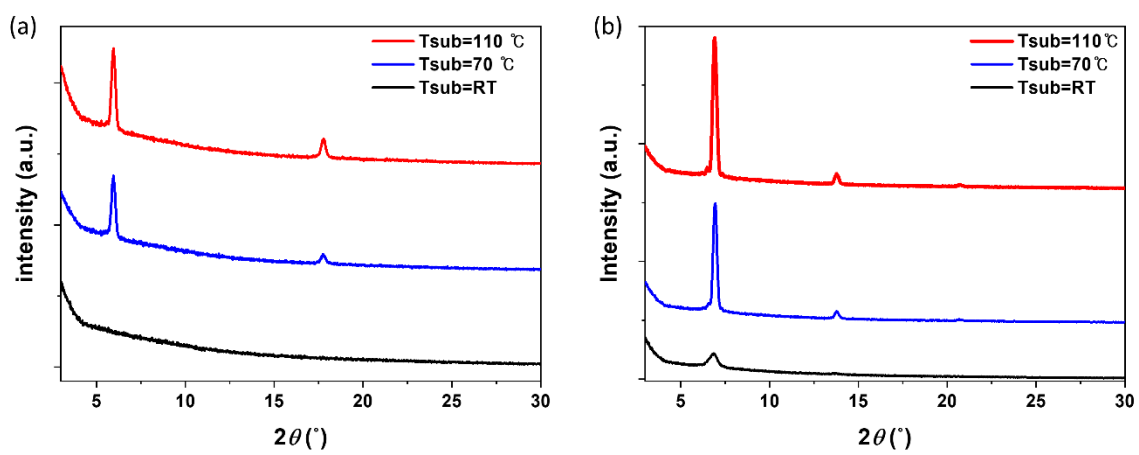

Figure S5. Out-of-plane XRD results of (a) NTDI-DCV and (b) NTDP-DCV vacuum-deposited thin films.

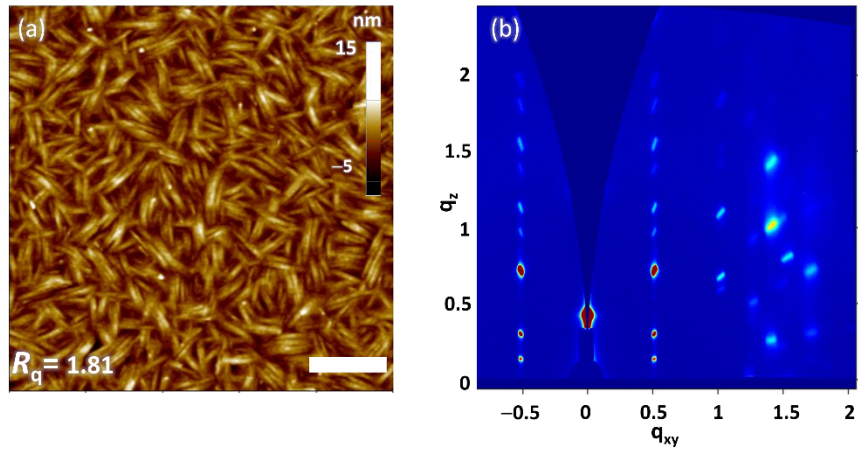

Figure S6. (a) AFM images (scale bar: 1  $\mu\text{m}$ ) and (b) 2D-GIWAXS patterns of the vacuum-deposited thin films for **NTDT-DCV** at  $T_{\text{sub}} = 70^\circ\text{C}$ .

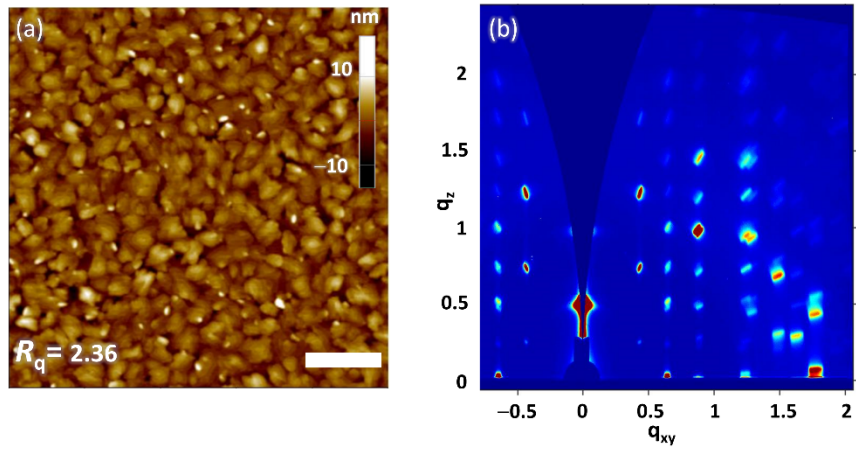

Figure S7. (a) AFM images (scale bar: 1  $\mu\text{m}$ ) and (b) 2D-GIWAXS patterns of the vacuum-deposited thin films for **NTDP-DCV** at  $T_{\text{sub}} = 70^\circ\text{C}$ .



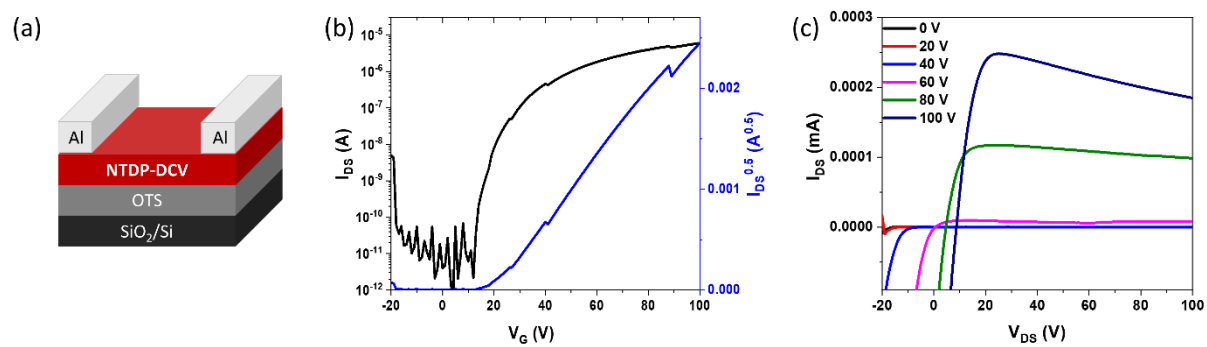

Figure S8. Schematic structure of OFETs for (a) **NTDP-DCV**, representative (b) transfer, and (c) output curve of solution processed **NTDP-DCV** OFETs at  $T_{\text{ann}}=140^{\circ}\text{C}$ .

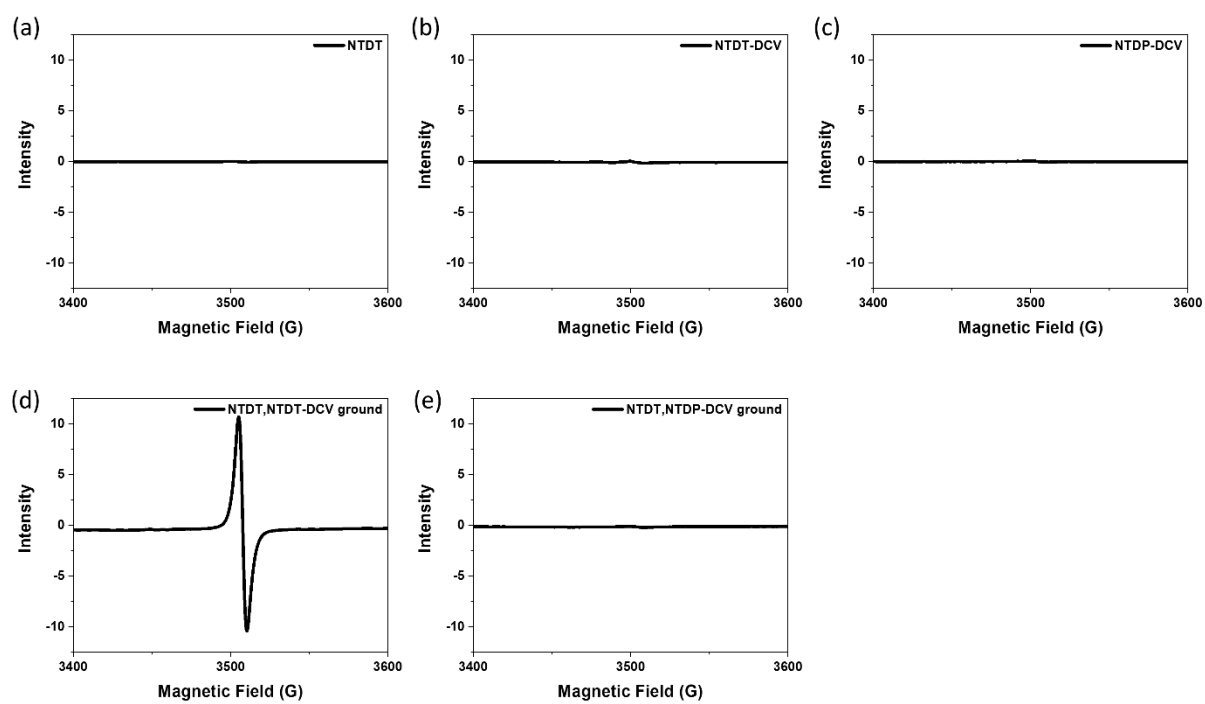

Figure S9. ESR spectra of the (a) **NTDT**, (b) **NTDT-DCV**, (c) **NTDP-DCV**, (d), **NTDT/NTDT-DCV ground** and (e) **NTDT/NTDP-DCV ground** samples.

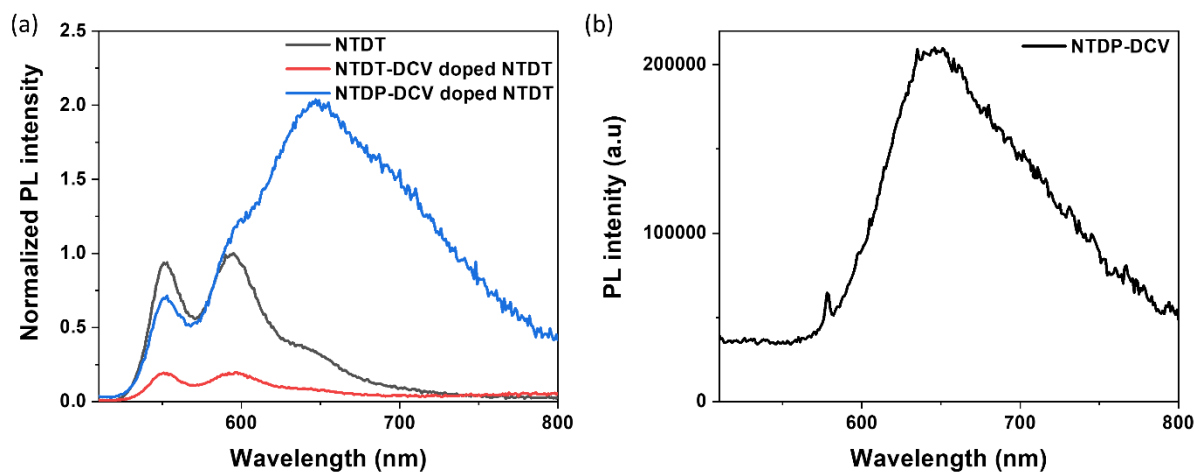

Figure S10. PL spectra of (a) pristine **NTD** (black line), **NTD-DCV** doped **NTD** (red line), and **NTD-DCV** doped **NTD** (blue line), and (b) pristine **NTD-DCV** thin film. The emission at 600–800 nm in **NTD-DCV** doped **NTD** film arose from **NTD-DCV** PL characteristic.

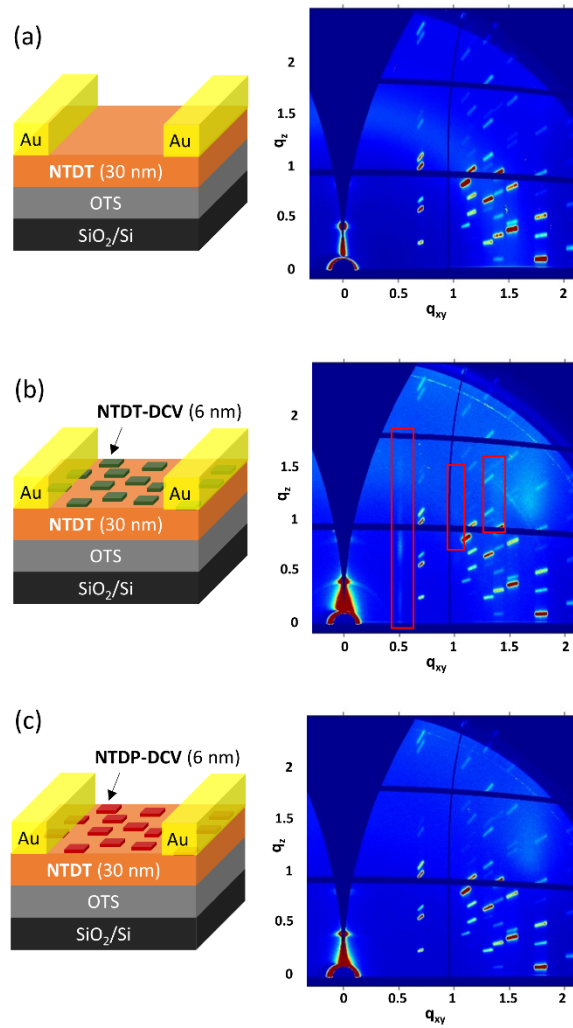

Figure S11. Schematic structure of OFETs and the corresponding 2D-GIWAXS images of (a) pristine **NTDT**, (b) **NTDT-DCV** doped **NTDT**, and (c) **NTDP-DCV** doped **NTDT** films. 2D-GIWAXS were measured at 3C SAXS-I beamline.

Table S1. Optical and electrochemical properties of **NTDT** and **NTDP**.

| Compound    | Solution                       |                                  |                                                  | Film                           |                                  |                                                  | Experimental<br>$E_{\text{HOMO}}/E_{\text{LUMO}}$<br>(eV) <sup>b</sup> |
|-------------|--------------------------------|----------------------------------|--------------------------------------------------|--------------------------------|----------------------------------|--------------------------------------------------|------------------------------------------------------------------------|
|             | $\lambda_{\text{max}}$<br>(nm) | $\lambda_{\text{onset}}$<br>(nm) | $E_{\text{g}}^{\text{opt}}$<br>(eV) <sup>a</sup> | $\lambda_{\text{max}}$<br>(nm) | $\lambda_{\text{onset}}$<br>(nm) | $E_{\text{g}}^{\text{opt}}$<br>(eV) <sup>a</sup> |                                                                        |
| <b>NTDT</b> | 497                            | 515                              | 2.50                                             | 533                            | 559                              | 2.22                                             | -5.42/-3.13                                                            |
| <b>NTDP</b> | 427                            | 473                              | 2.62                                             | 458                            | 512                              | 2.42                                             | -5.58/-2.96                                                            |

<sup>a</sup> Determined from the onset of absorption spectra ( $E_{\text{g}}^{\text{opt}} = 1240/\lambda_{\text{onset}}$ ). <sup>b</sup> Measured by cyclic voltammetry in thin film states.

Table S2. [kl] Planes deduced from in-plane reflection along the  $q_{xy}$ -direction in the vacuum deposited thin-film at  $T_{\text{sub}} = 110^\circ\text{C}$ .

|                 | $q_{xy}$ ( $\text{\AA}^{-1}$ ) | hkl    |
|-----------------|--------------------------------|--------|
| <b>NTDT-DCV</b> | 0.52                           | (h01)  |
|                 | 1.04                           | (h02)  |
|                 | 1.25                           | (h10)  |
|                 | 1.28                           | (h1-1) |
|                 | 1.42                           | (h11)  |
|                 | 1.51                           | (h1-2) |
|                 | 1.56                           | (h03)  |
|                 | 1.73                           | (h12)  |
| <b>NTDP-DCV</b> | 0.44                           | (h01)  |
|                 | 0.64                           | (h10)  |
|                 | 0.67                           | (h1-1) |
|                 | 0.87                           | (h11)  |
|                 | 0.88                           | (h02)  |
|                 | 1.22                           | (h12)  |
|                 | 1.27                           | (h20)  |
|                 | 1.32                           | (h03)  |
|                 | 1.46                           | (h21)  |
|                 | 1.62                           | (h13)  |
|                 | 1.74                           | (h22)  |
|                 | 1.94                           | (h30)  |

Table S3. Solution-processed OFET characteristics of **NTDP-DCV**

| compound        | $T_{\text{ann}}$ (°C) | $\mu_{e, \text{avg}}$ ( $\text{cm}^2 \text{V}^{-1} \text{s}^{-1}$ ) <sup>a</sup> | $\mu_{e, \text{max}}$ ( $\text{cm}^2 \text{V}^{-1} \text{s}^{-1}$ ) <sup>b</sup> | $V_{\text{th}}$ (V) <sup>c</sup> | $I_{\text{on}}/I_{\text{off}}$ |
|-----------------|-----------------------|----------------------------------------------------------------------------------|----------------------------------------------------------------------------------|----------------------------------|--------------------------------|
| <b>NTDP-DCV</b> | 140                   | $(1.96 \pm 0.57) \times 10^{-2}$                                                 | 0.021                                                                            | $20.8 \pm 4.0$                   | $\sim 10^6$                    |

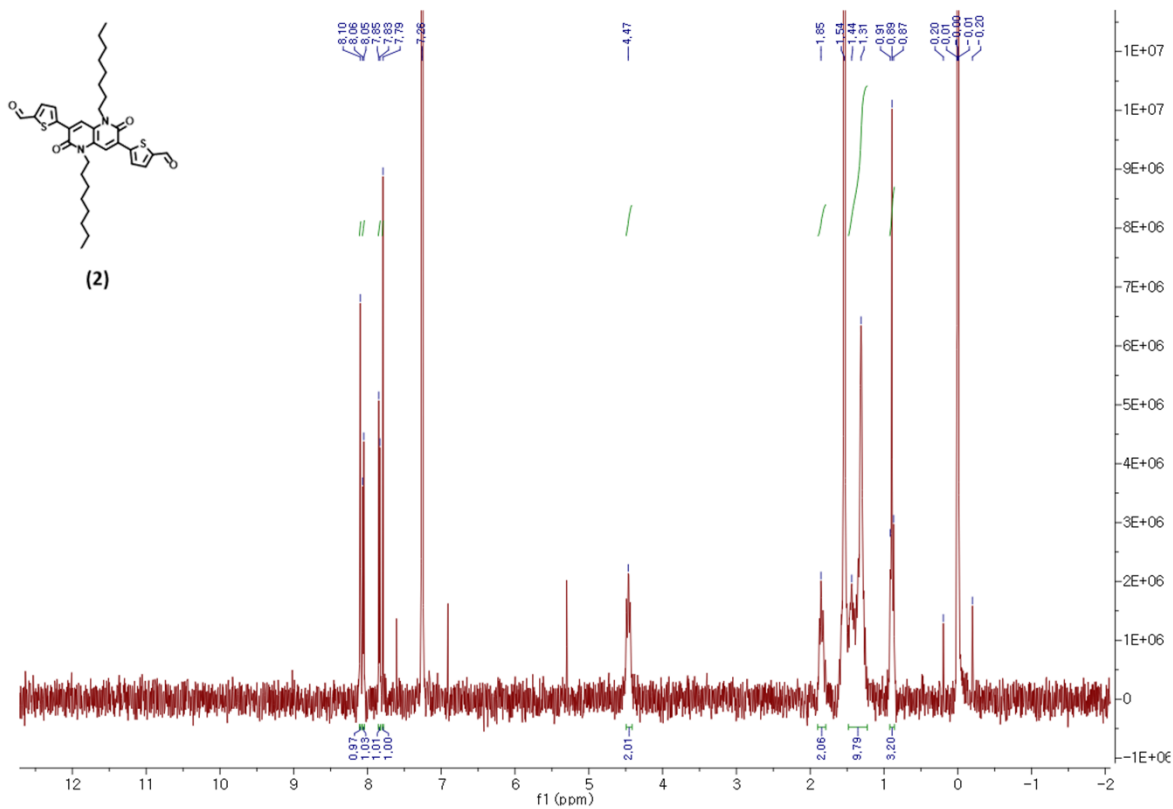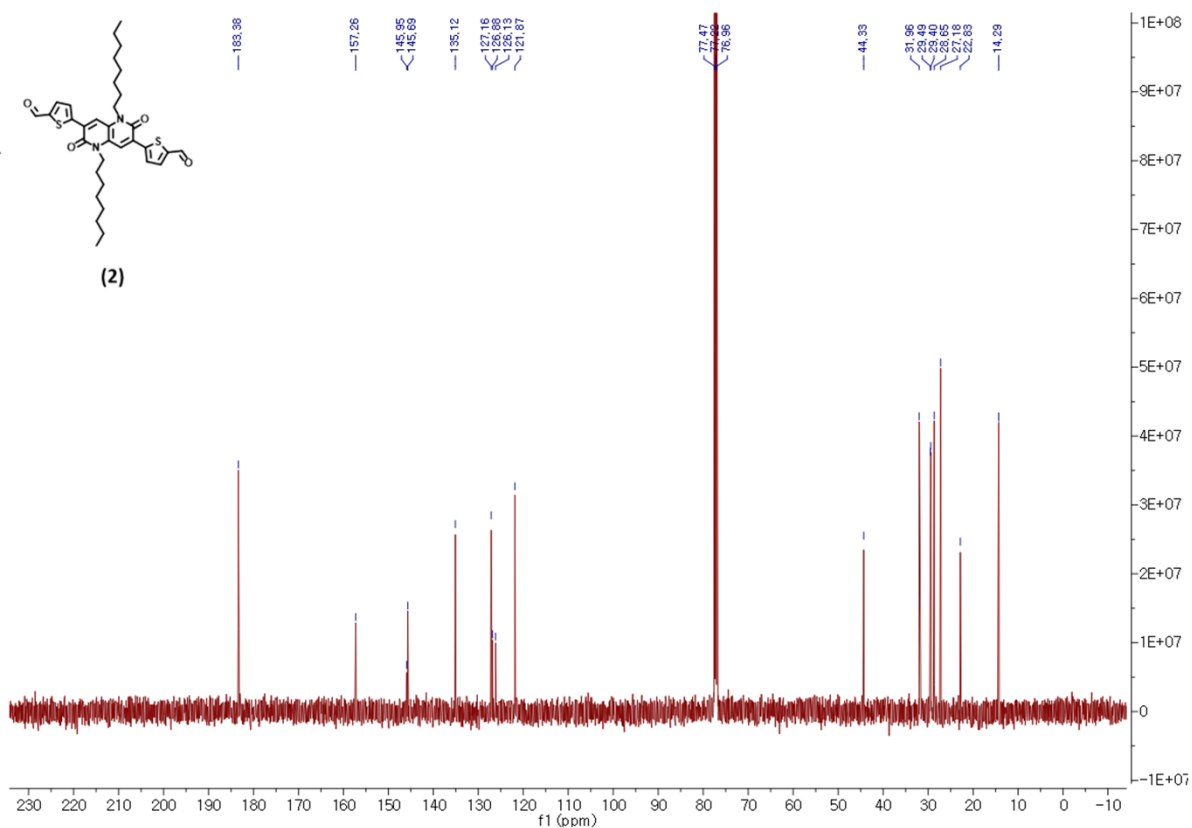

<sup>1</sup>H-NMR and <sup>13</sup>C-NMR Spectra of **5,5'-(1,5-dioctyl-2,6-dioxo-1,2,5,6-tetrahydro-1,5-naphthyridine-3,7-diyl)bis(thiophene-2-carbaldehyde) (2)**.



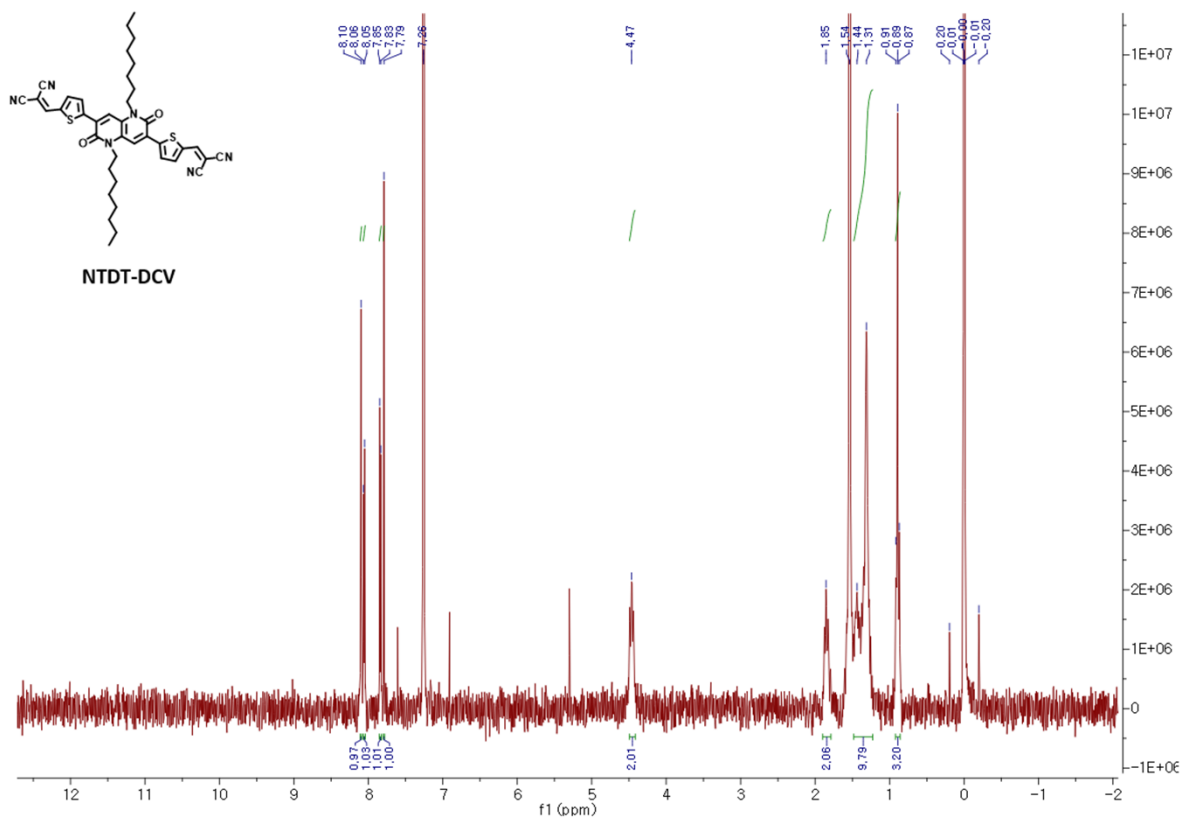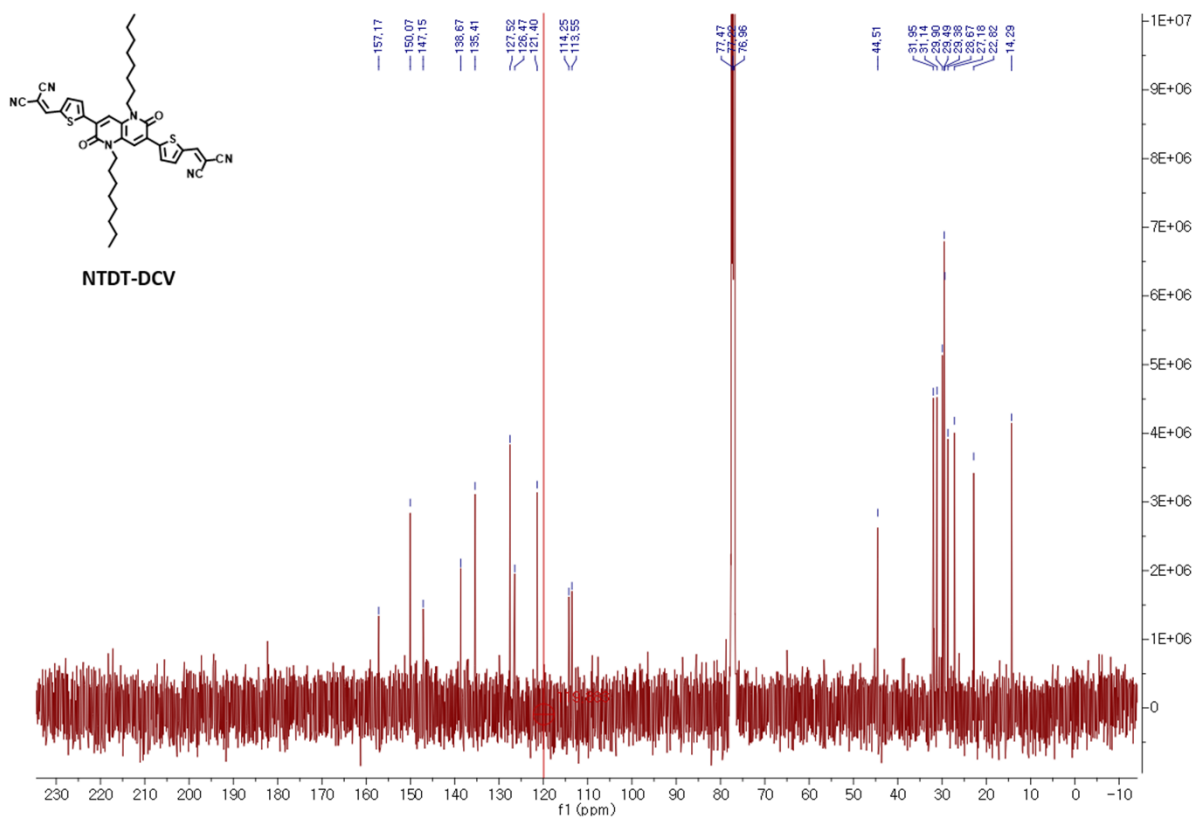

<sup>1</sup>H-NMR and <sup>13</sup>C-NMR Spectra of **NTDT-DCV**.

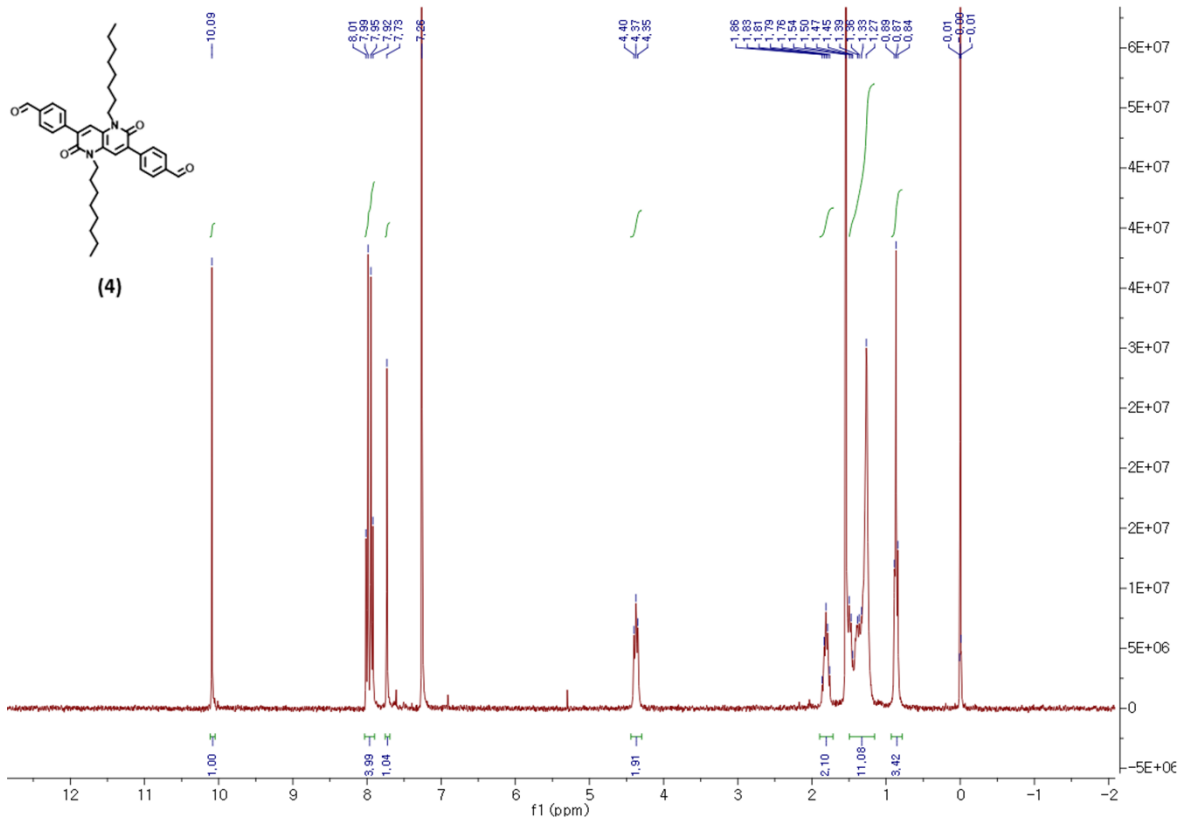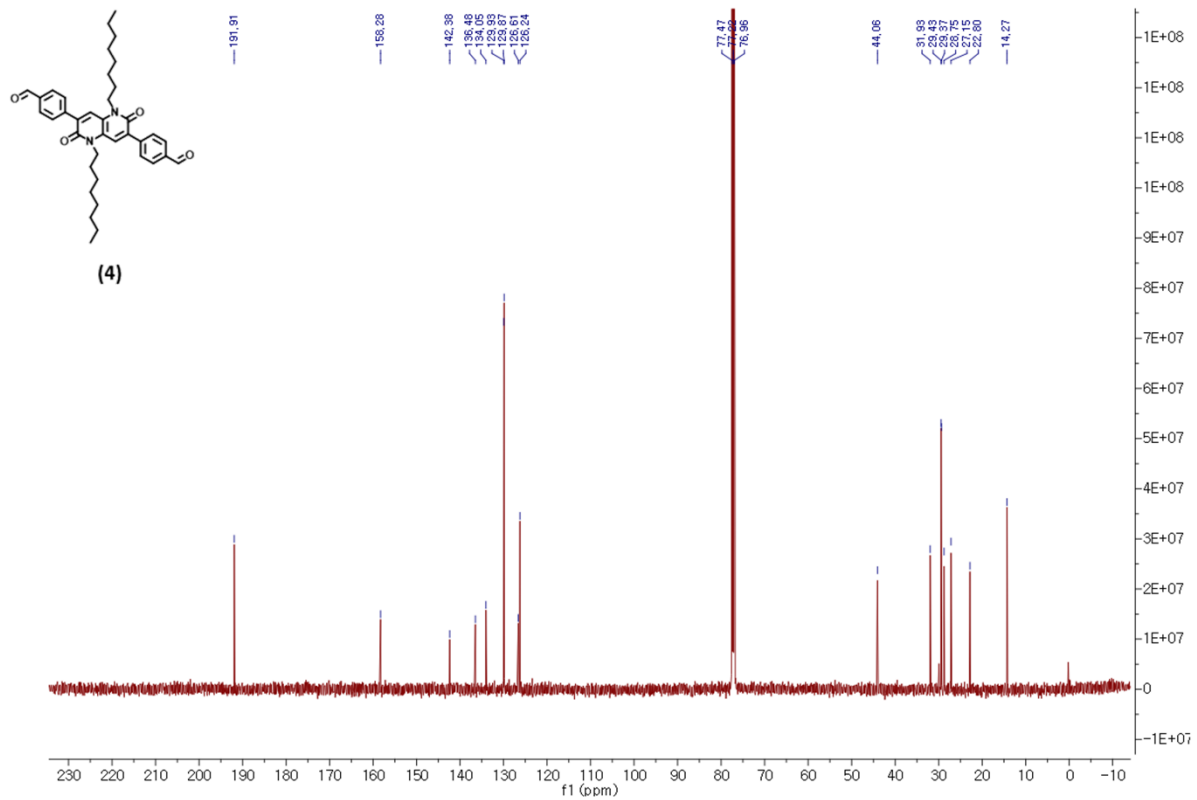

<sup>1</sup>H-NMR and <sup>13</sup>C-NMR Spectra of. **4,4'-(1,5-dioctyl-2,6-dioxo-1,2,5,6-tetrahydro-1,5-naphthyridine-3,7-diyl)dibenzaldehyde (4)**.

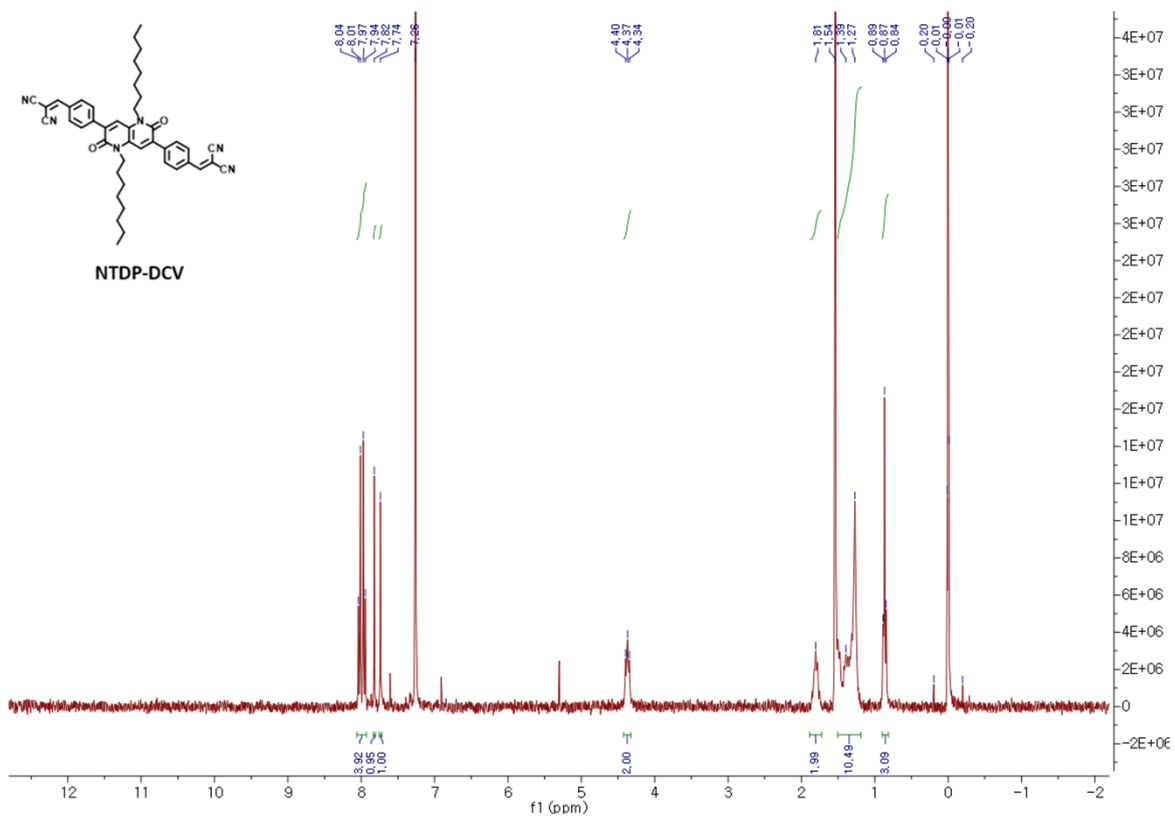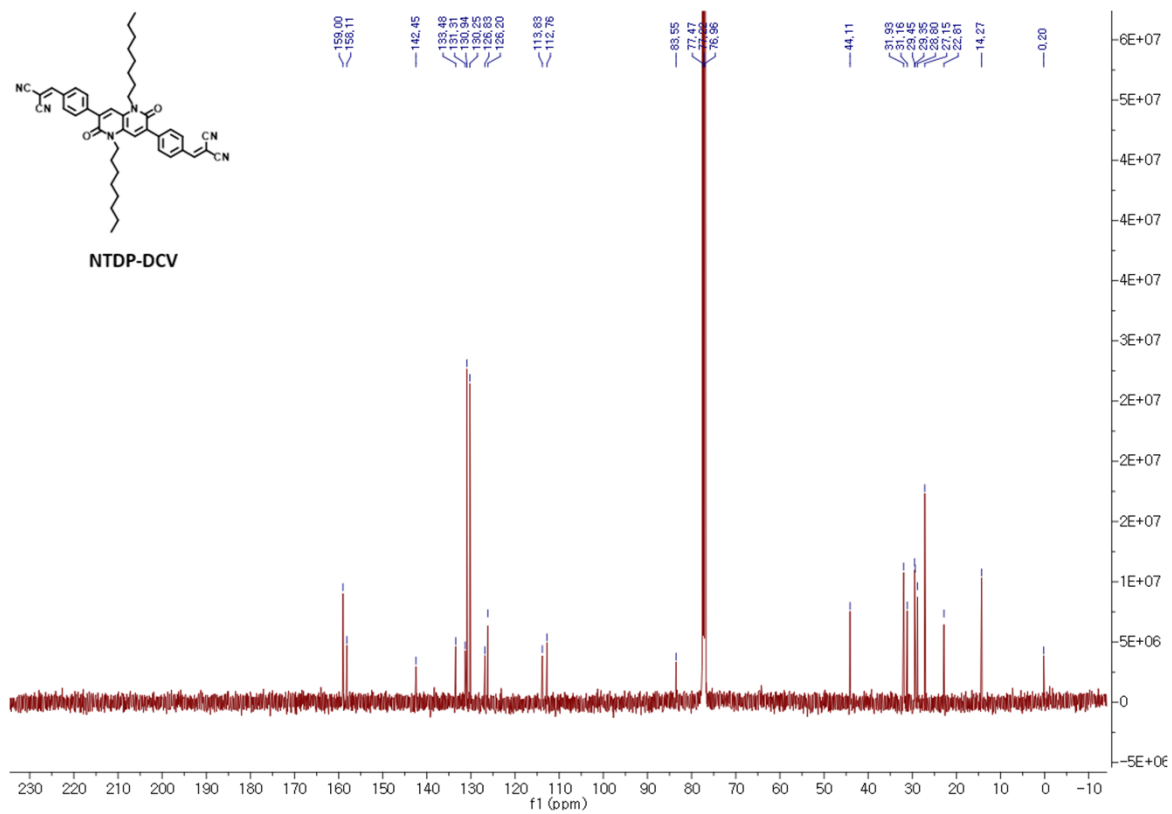

<sup>1</sup>H-NMR and <sup>13</sup>C-NMR Spectra of **NTDP-DCV**.
